# Supplementary material for: Twelve-Month Studies on Perilla Oil Intake in Japanese Adults—Possible Supplement for Mental Health
Source: PubMed Central journal article supplement (PMC7230189; doi:10.3390/foods9040530), 2020-04-22
Supplement: foods-09-00530-s001.pdf [file foods-09-00530-s001.pdf]

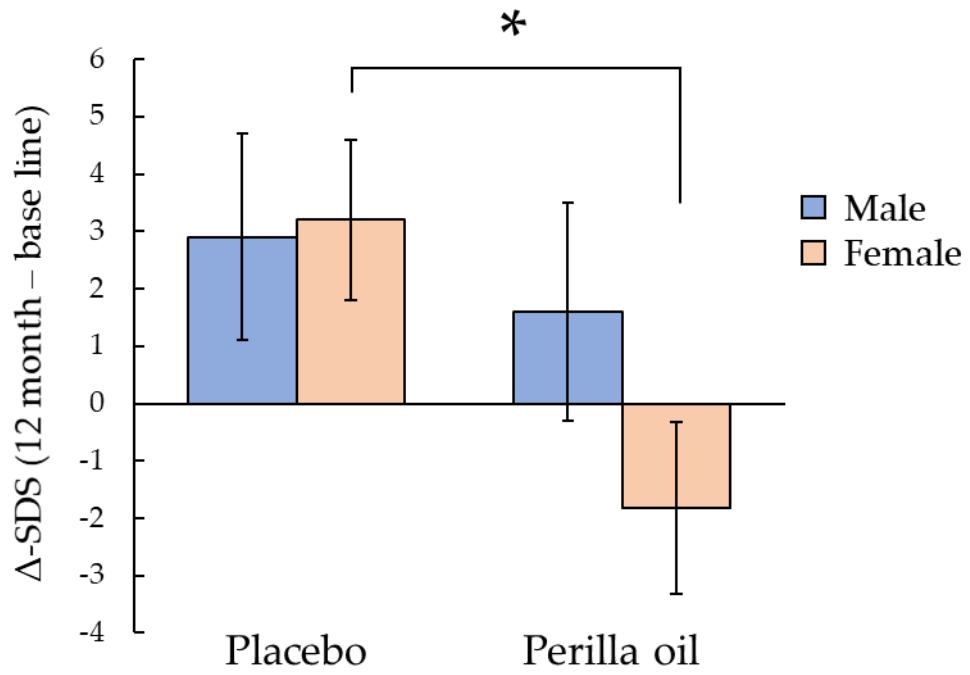

**Supplemental Figure S1.** The differences between male and female in  $\Delta$ -SDS score from baseline to 12 months in the PO and placebo groups.  $\Delta$ -SDS score in female subjects was significantly lower in the PO group than that of placebo group. Results are means  $\pm$  SE. \* $p < 0.05$ .
